# Supplementary material for: Potential Inhibitors for Novel Coronavirus Protease Identified by Virtual Screening of 606 Million Compounds
Source: PubMed Central journal article supplement (PMC7279339; doi:10.3390/ijms21103626), 2020-05-21
Supplement: ijms-21-03626-s001.pdf [file ijms-21-03626-s001.pdf]

# Supporting Information

## Potential Inhibitors for Novel Coronavirus Protease Identified by Virtual Screening of 606 Million Compounds

André Fischer, Manuel Sellner, Santhosh Neranjan, Martin Smieško\*, and Markus A. Lill\*,

*Computational Pharmacy Group, Department of Pharmaceutical Sciences, Klingelbergstrasse 50, 4056 Basel*

*Corresponding author contact: martin.smiesko@unibas.ch, markus.lill@unibas.ch*

**Abstract:** The rapid outbreak of the novel severe acute respiratory syndrome coronavirus 2 (SARS-CoV-2) in China followed by its spread around the world poses a serious global concern for public health with almost two million people tested positive and more than hundred thousand of fatalities up to date. To this date, no specific drugs or vaccines are available to treat SARS-CoV-2 despite its close relation to the SARS-CoV-1 virus that caused a similar epidemic in 2003. Thus, there remains an urgent need for the identification and development of specific antiviral therapeutics to conquer SARS-CoV-2. To conquer viral infections, the inhibition of proteases essential for proteolytic processing of viral polyproteins is a conventional therapeutic strategy. In order to find novel inhibitors, we computationally screened a compound library of over 606 million compounds for binding at the recently solved crystal structure of the main protease ( $M^{pro}$ ) of SARS-CoV-2. A screening of such a vast chemical space for SARS-CoV-2  $M^{pro}$  inhibitors has not been reported before. After shape screening, two docking protocols were applied followed by the determination of molecular descriptors relevant for pharmacokinetics to narrow down the number of initial hits. Next, molecular dynamics simulations were conducted to validate the stability of docked binding modes and comprehensively quantify ligand binding energies. After evaluation of off-target binding, we report a list of 12 purchasable compounds, with binding affinity to the target protease that is predicted to be more favorable than that of the cocrystallized peptidomimetic compound. In order to quickly advise ongoing therapeutic intervention for patients, we evaluated approved antiviral drugs and other protease inhibitors to provide a list of 9 compounds for drug repurposing. Furthermore, we identified the natural compounds (-)-taxifolin and rhamnetin as potential inhibitors of  $M^{pro}$ . Rhamnetin is already commercially available in pharmacies.

### Table of Contents

#### Supporting Results and Discussion

|                                                                                       |    |
|---------------------------------------------------------------------------------------|----|
| Virtual Screening Procedures: Figures S1-S5, Tables S1-S3, Pharmacokinetic parameters | 2  |
| Final Selection of Compounds: Figures S6-S8, Tables S4-S6                             | 11 |
| <u>Supporting Materials and Methods</u>                                               |    |
| Docking and shape screening: Table S7                                                 | 13 |
| <u>Supporting References</u>                                                          | 13 |

## Supporting Results and Discussion

### Virtual screening procedures

**Figure S1.** Virtual screening workflow for compounds with molecular weight above 500 g/mol.

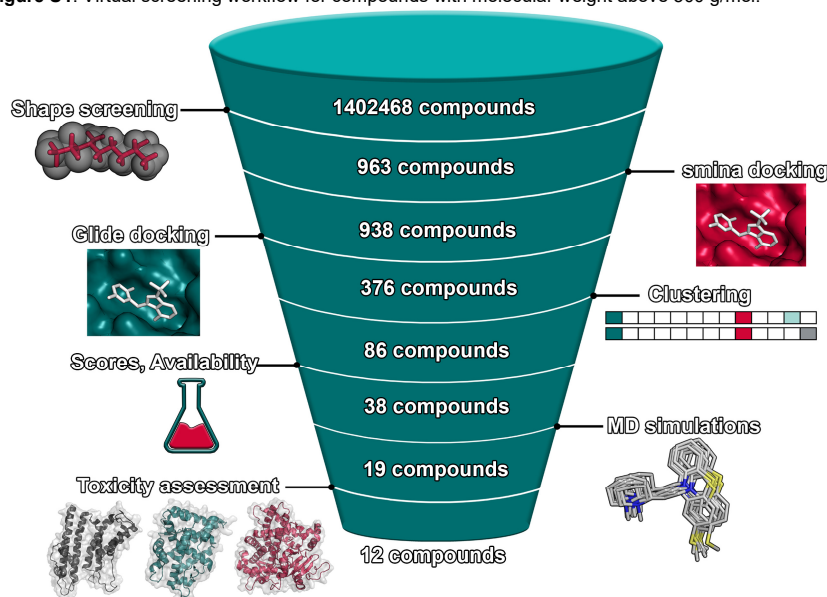

**Figure S2.** Structure alignment of SARS-CoV-2 crystal structures.

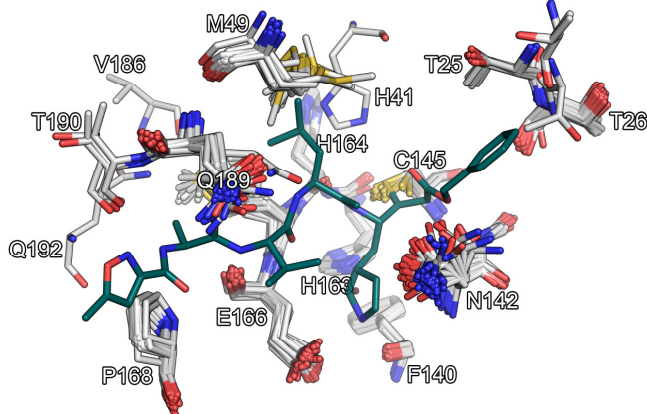

The following crystal structures were aligned: 6LU7, 6Y2G, 5M03, 5R84, 5R83, 5R82, 5R80, 5R7Z, Mpro-x0072, Mpro-x0104, Mpro-x0107, Mpro-x0161, Mpro-x0195, Mpro-x0305, Mpro-x0354, Mpro-x0387, Mpro-x0434, Mpro-x0540, Mpro-x0678, Mpro-x0689, Mpro-x0691, Mpro-x0692, Mpro-x0734, Mpro-x0749, Mpro-x0752, Mpro-x0755, Mpro-x0759, Mpro-x0769, Mpro-x0770, Mpro-x0774, Mpro-x0786, Mpro-x0820, Mpro-x0830, Mpro-x0831, Mpro-x0874, Mpro-x0946, Mpro-x0967, Mpro-x0978, Mpro-x0981, Mpro-x0991, Mpro-x0995, Mpro-x1077, Mpro-x1093, Mpro-x1249, Mpro-x1308, Mpro-x1311, Mpro-x1334, Mpro-x1336, Mpro-x1348, Mpro-x1351, Mpro-x1358, Mpro-x1374, Mpro-x1375, Mpro-x1380, Mpro-x1382, Mpro-x1384, Mpro-x1385, Mpro-x1386, Mpro-x1392, Mpro-x1402, Mpro-x1412, Mpro-x1418, Mpro-x1425, Mpro-x1458, Mpro-x1478, and Mpro-x1493. The cocrystallized ligand N3 of the protein structure 6LU7 is shown and was used to determine residues involved in ligand binding.

**Figure S3.** Distribution of pharmacokinetically relevant descriptors for all hits supplied to the Glide SP docking protocol.

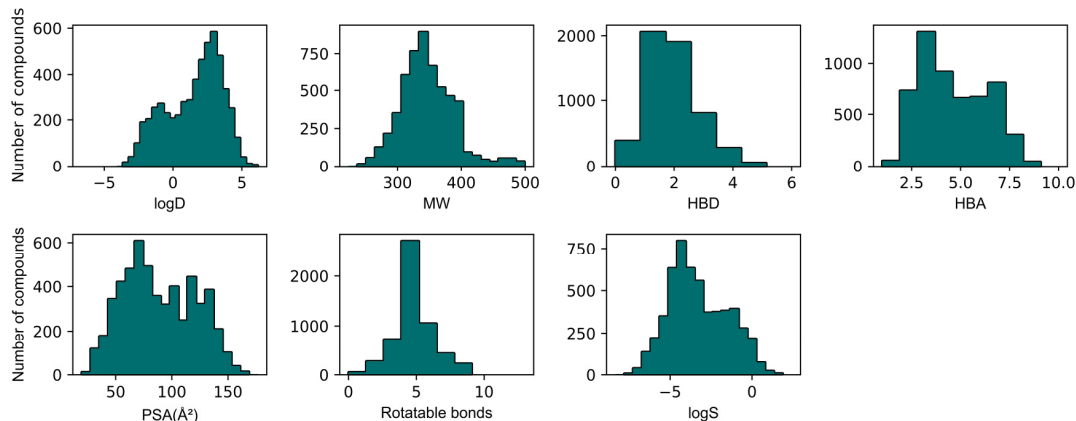

Abbreviations: HBA, hydrogen bond donors, HBD, hydrogen bond donors

## Pharmacokinetic parameters

The pharmacokinetic descriptors of these compounds are shown in Figure S3. Due to our selection criterion for extracting compounds from the ZINC database, drug-likeness with respect to molecular weight (MW) was guaranteed. Several compounds, however, violated commonly accepted criteria such as the distribution coefficient logD and polar surface area (PSA). Those compounds were eliminated from further consideration. Due to the catalytic function of the target enzyme, peptides and peptidomimetics are widely applied in targeting proteases.<sup>1</sup> Nonetheless, disadvantages of peptides or peptidomimetics include limited oral bioavailability due to their large MW, PSA, and high number of rotatable bonds as well as poor metabolic stability and higher production cost.<sup>2</sup> Therefore, the development of small-molecules with balanced and favorable pharmacokinetic properties facilitating oral absorption offers a promising alternative.

**Table S1.** Redocking of crystallographic ligands.

| <i>Crystal structure</i> | <i>Ligand 2D structure</i>                                                          | <i>RMSD<br/>Glide (Å)</i> | <i>RMSD<br/>smina (Å)</i> |
|--------------------------|-------------------------------------------------------------------------------------|---------------------------|---------------------------|
| Mpro-x0072               | 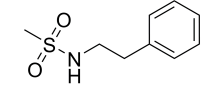   | 4.78                      | 4.94                      |
| Mpro-x0104               |    | 5.97                      | 2.70                      |
| Mpro-x0107               |    | 4.25                      | 2.52                      |
| Mpro-x0161               |   | 3.37                      | 2.21                      |
| Mpro-x0195               |  | 2.95                      | 2.91                      |
| Mpro-x0305               |  | 3.49                      | 3.34                      |
| Mpro-x0354               |  | 5.79                      | 7.40                      |
| Mpro-x0387               |  | 4.32                      | 5.49                      |
| Mpro-x0434               |  | 1.25                      | 2.05                      |
|                          |  | 8.85                      | 7.62                      |
| Mpro-x0678               |  | 2.57                      | 2.04                      |

|            |                                                                                     |      |      |
|------------|-------------------------------------------------------------------------------------|------|------|
| Mpro-x0689 | 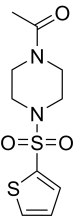   | 4.58 | 5.10 |
| Mpro-x0691 |    | 4.62 | 5.87 |
| Mpro-x0692 |    | 2.71 | 2.68 |
| Mpro-x0734 |    | 6.34 | 5.70 |
| Mpro-x0749 |   | 4.20 | 4.23 |
| Mpro-x0752 |  | 8.06 | 5.44 |
| Mpro-x0755 |  | 7.42 | 6.11 |
| Mpro-x0759 |  | 4.51 | 3.57 |
| Mpro-x0769 |  | 4.69 | 5.98 |
| Mpro-x0770 |  | 2.33 | 2.45 |

|            |                                                                                     |      |      |
|------------|-------------------------------------------------------------------------------------|------|------|
| Mpro-x0774 | 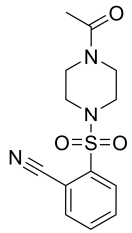   | 4.38 | 4.6  |
| Mpro-x0786 |    | 9.61 | 5.63 |
| Mpro-x0820 |    | 4.96 | 6.18 |
| Mpro-x0830 |    | 2.71 | 2.90 |
| Mpro-x0831 |   | 2.90 | 3.12 |
| Mpro-x0874 |  | 2.45 | 3.00 |
| Mpro-x0946 |  | 3.13 | 3.65 |
| Mpro-x0967 |  | 2.77 | 4.15 |
| Mpro-x0978 |  | 6.36 | 2.70 |
| Mpro-x0981 |  | 7.54 | 6.96 |
| Mpro-x0991 |  | 4.41 | 5.71 |
| Mpro-x0995 |  | 7.76 | 2.22 |
| Mpro-x1077 |  | 5.06 | 5.37 |

|            |                                                                                     |      |      |
|------------|-------------------------------------------------------------------------------------|------|------|
| Mpro-x1093 | 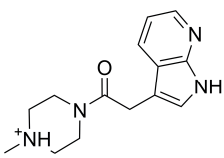   | 1.76 | 4.27 |
| Mpro-x1249 |    | 4.14 | 3.43 |
| Mpro-x1308 |    | 4.83 | 6.33 |
| Mpro-x1311 |    | 5.02 | 3.31 |
| Mpro-x1334 |    | 4.54 | 4.91 |
| Mpro-x1336 |   | 4.97 | 5.33 |
| Mpro-x1348 |  | 7.02 | 4.58 |
| Mpro-x1351 |  | 5.73 | 5.81 |
| Mpro-x1358 |  | 5.53 | 5.30 |
| Mpro-x1374 |  | 3.09 | 3.28 |
| Mpro-x1375 |  | 4.18 | 4.61 |
| Mpro-x1380 |  | 5.98 | 5.74 |

|            |                                                                                     |      |      |
|------------|-------------------------------------------------------------------------------------|------|------|
| Mpro-x1382 | 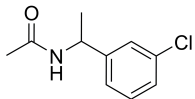   | 1.69 | 1.60 |
| Mpro-x1384 |    | 6.06 | 5.23 |
| Mpro-x1385 |    | 4.57 | 5.07 |
| Mpro-x1386 |    | 2.25 | 2.45 |
| Mpro-x1392 |    | 4.07 | 3.73 |
| Mpro-x1402 |   | 4.88 | 5.70 |
| Mpro-x1412 |  | 4.28 | 3.64 |
| Mpro-x1418 |  | 1.15 | 2.44 |
| Mpro-x1425 |  | 6.90 | 6.52 |
| Mpro-x1458 |  | 4.96 | 2.37 |
| Mpro-x1478 |  | 3.47 | 3.97 |
| Mpro-x1493 |  | 2.16 | 5.44 |

|      |                                                                                   |      |      |
|------|-----------------------------------------------------------------------------------|------|------|
| 6LU7 | 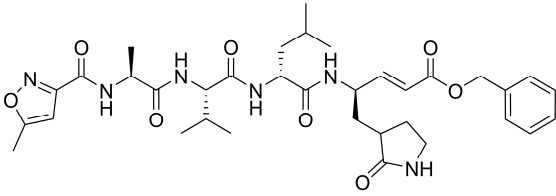 | 3.09 | 1.62 |
| 5R7Z |  | 5.94 | 2.72 |
| 5R81 |  | 3.12 | 3.03 |
| 6Y2F |  | 4.97 | 4.40 |
| 6Y7M |  | 2.75 | 2.33 |

The lowest RMSD of the cocrystallized ligands compared to all five ensemble structures is reported. Crystal structures lacking the standard PDB notation were derived from the diamond webpage.<sup>3</sup>

**Figure S4.** RMSD distribution of redocking crystallographic ligands

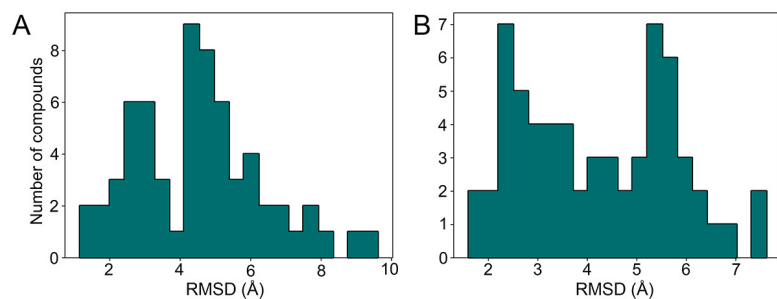

(A) RMSD distribution of the Glide SP protocol. (B) RMSD distribution of the smina protocol.

**Figure S5.** Redocking of cocrystallized ligand N3.

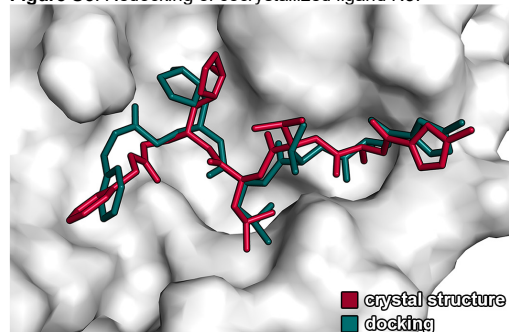

The cocrystallized ligand N3 (PDB ID 6LU7) was docked with the smina docking protocol to one of the ensemble structures.



**Table S2.** All hits for which MD simulations were conducted for the main screening workflow.

| ZINC ID          | $\Delta G$<br>(kcal/mol) <sup>a</sup> | Glide score<br>(kcal/mol) <sup>b</sup> | Smina Score<br>(kcal/mol) <sup>b</sup> | Shape<br>overlap | MW<br>(g/mol) | logD | logS | PSA<br>(Å <sup>2</sup> ) | #rot <sup>c</sup> | ToxPot <sup>d</sup> | Availability <sup>e</sup> |
|------------------|---------------------------------------|----------------------------------------|----------------------------------------|------------------|---------------|------|------|--------------------------|-------------------|---------------------|---------------------------|
| ZINC000225850198 | -80.0 ± 5.9                           | -7.6                                   | -7.8                                   | 0.53             | 457.5         | 2.8  | -6.0 | 91.7                     | 8                 | 0.575               | In-Stock                  |
| ZINC000535149169 | -78.2 ± 5.2                           | -8.7                                   | -8.0                                   | 0.46             | 406.5         | 3.0  | -4.1 | 110.3                    | 9                 | 0.226               | On-Demand                 |
| ZINC000956196830 | -75.1 ± 4.1                           | -7.3                                   | -8.0                                   | 0.45             | 346.3         | -1.9 | -1.8 | 129.8                    | 5                 | 0.409               | On-Demand                 |
| ZINC000409084056 | -72.6 ± 5.6                           | -7.7                                   | -8.3                                   | 0.52             | 340.4         | 4.7  | -5.4 | 52.9                     | 3                 | 0.516               | In-Stock                  |
| ZINC000078346821 | -70.6 ± 3.9                           | -7.1                                   | -7.4                                   | 0.53             | 328.4         | 0.0  | -2.3 | 73.0                     | 4                 | 0.352               | On-Demand                 |
| ZINC001564830248 | -70.3 ± 5.0                           | -7.2                                   | -8.0                                   | 0.55             | 367.4         | 2.5  | -4.2 | 72.3                     | 3                 | 0.365               | On-Demand                 |
| ZINC000436769723 | -69.8 ± 4.2                           | -7.7                                   | -7.6                                   | 0.51             | 353.4         | 3.3  | -4.7 | 84.2                     | 5                 | 0.291               | On-Demand                 |
| ZINC000067739035 | -69.6 ± 3.1                           | -7.7                                   | -7.3                                   | 0.58             | 272.7         | 3.1  | -4.0 | 73.1                     | 2                 | 0.493               | On-Demand                 |
| ZINC000582866919 | -68.9 ± 4.2                           | -8.2                                   | -7.7                                   | 0.54             | 364.4         | 4.2  | -4.9 | 59.8                     | 5                 | 0.511               | On-Demand                 |
| ZINC000751777236 | -66.7 ± 4.7                           | -7.7                                   | -8.2                                   | 0.53             | 383.4         | 3.8  | -5.4 | 63.7                     | 6                 | 0.492               | On-Demand                 |
| ZINC000437877882 | -66.7 ± 4.8                           | -7.2                                   | -8.3                                   | 0.46             | 346.4         | -0.5 | -2.2 | 122.6                    | 6                 | 0.102               | On-Demand                 |
| ZINC000000811341 | -65.3 ± 3.6                           | -7.4                                   | -7.8                                   | 0.54             | 391.4         | 3.5  | -6.0 | 105.5                    | 6                 | 0.494               | In-Stock                  |
| ZINC000578308864 | -64.6 ± 3.3                           | -7.2                                   | -7.4                                   | 0.54             | 364.5         | -0.4 | -0.6 | 66.0                     | 3                 | 0.586               | On-Demand                 |
| ZINC000041934593 | -64.2 ± 4.9                           | -7.4                                   | -7.3                                   | 0.46             | 336.4         | 1.8  | -3.8 | 115.8                    | 6                 | 0.608               | On-Demand                 |
| ZINC000077330923 | -64.0 ± 4.5                           | -7.7                                   | -7.3                                   | 0.54             | 320.3         | 2.8  | -5.0 | 65.3                     | 5                 | 0.460               | On-Demand                 |
| ZINC000126278505 | -63.9 ± 4.1                           | -7.3                                   | -7.5                                   | 0.54             | 336.4         | 2.8  | -4.0 | 64.4                     | 6                 | 0.630               | On-Demand                 |
| ZINC000363098575 | -63.8 ± 3.6                           | -7.7                                   | -7.3                                   | 0.54             | 324.4         | 3.5  | -5.5 | 70.7                     | 4                 | 0.548               | On-Demand                 |
| ZINC001347593526 | -63.0 ± 4.7                           | -7.9                                   | -7.2                                   | 0.46             | 331.3         | -1.2 | -2.8 | 110.5                    | 5                 | 0.611               | For-Sale                  |
| ZINC000358067132 | -62.1 ± 6.3                           | -8.0                                   | -7.3                                   | 0.45             | 333.4         | -0.9 | -3.2 | 130.6                    | 5                 | 0.067               | On-Demand                 |
| ZINC001189741739 | -61.9 ± 6.3                           | -7.4                                   | -7.8                                   | 0.45             | 321.3         | -3.4 | -1.0 | 137.3                    | 4                 | 0.195               | On-Demand                 |
| ZINC000750235152 | -61.8 ± 4.4                           | -8.0                                   | -7.8                                   | 0.53             | 367.5         | 1.6  | -4.1 | 71.1                     | 7                 | 0.198               | On-Demand                 |
| ZINC000430671052 | -61.7 ± 5.5                           | -7.4                                   | -7.5                                   | 0.45             | 383.5         | 3.5  | -5.7 | 62.3                     | 4                 | 0.308               | On-Demand                 |
| ZINC000434329703 | -61.7 ± 4.1                           | -7.2                                   | -7.5                                   | 0.47             | 403.5         | 3.8  | -4.5 | 68.4                     | 6                 | 0.318               | On-Demand                 |
| ZINC001168304430 | -61.3 ± 7.9                           | -7.6                                   | -7.6                                   | 0.55             | 311.3         | 0.8  | -2.9 | 73.7                     | 5                 | 0.471               | On-Demand                 |
| ZINC000496197655 | -61.3 ± 3.4                           | -7.4                                   | -7.7                                   | 0.52             | 365.5         | 2.8  | -3.9 | 36.0                     | 4                 | 0.475               | On-Demand                 |
| ZINC001455620085 | -60.9 ± 3.2                           | -7.2                                   | -7.5                                   | 0.47             | 357.3         | 2.4  | -4.7 | 88.8                     | 6                 | 0.538               | For-Sale                  |
| ZINC001136602636 | -60.9 ± 4.9                           | -7.8                                   | -7.4                                   | 0.56             | 340.4         | 2.4  | -3.9 | 64.4                     | 6                 | 0.604               | On-Demand                 |
| ZINC000750577508 | -60.4 ± 4.5                           | -7.4                                   | -7.3                                   | 0.54             | 296.3         | 1.9  | -4.6 | 70.7                     | 4                 | 0.588               | On-Demand                 |
| ZINC000016570909 | -60.3 ± 4.8                           | -7.6                                   | -7.9                                   | 0.53             | 487.0         | 3.5  | -5.9 | 73.0                     | 5                 | 0.291               | For-Sale                  |
| ZINC001219716796 | -59.8 ± 4.8                           | -9.0                                   | -8.4                                   | 0.46             | 349.3         | -2.0 | -2.2 | 139.7                    | 4                 | 0.319               | On-Demand                 |
| ZINC000589181351 | -59.2 ± 7.3                           | -7.8                                   | -7.7                                   | 0.57             | 376.4         | 3.0  | -4.7 | 90.2                     | 5                 | 0.229               | On-Demand                 |
| ZINC000006190212 | -59.1 ± 5.2                           | -7.5                                   | -7.7                                   | 0.59             | 374.4         | 3.7  | -5.8 | 71.3                     | 7                 | n/a                 | In-Stock                  |
| ZINC000956195718 | -59.1 ± 3.9                           | -7.3                                   | -7.5                                   | 0.46             | 319.3         | -2.0 | -1.4 | 129.9                    | 5                 | n/a                 | On-Demand                 |
| ZINC000225779089 | -59.0 ± 5.1                           | -7.4                                   | -7.3                                   | 0.53             | 445.5         | 2.5  | -4.7 | 83.8                     | 8                 | n/a                 | In-Stock                  |
| ZINC000527718030 | -58.3 ± 4.3                           | -7.5                                   | -7.3                                   | 0.5              | 384.4         | 3.0  | -3.8 | 36.8                     | 5                 | n/a                 | On-Demand                 |
| ZINC001338948346 | -58.2 ± 6.1                           | -7.9                                   | -7.8                                   | 0.56             | 399.5         | 2.3  | -5.2 | 78.8                     | 4                 | n/a                 | On-Demand                 |
| ZINC001171153103 | -58.2 ± 7.5                           | -7.9                                   | -7.6                                   | 0.46             | 353.4         | -0.2 | -2.0 | 124.2                    | 7                 | n/a                 | For-Sale                  |
| ZINC000096113815 | -58.1 ± 4.3                           | -7.5                                   | -8.3                                   | 0.56             | 406.4         | 2.4  | -3.7 | 126.4                    | 2                 | n/a                 | In-Stock                  |
| ZINC000128114011 | -57.6 ± 4.8                           | -7.9                                   | -7.2                                   | 0.54             | 296.4         | 2.5  | -3.5 | 52.6                     | 3                 | n/a                 | On-Demand                 |
| ZINC001610622935 | -57.4 ± 4.1                           | -7.8                                   | -7.7                                   | 0.54             | 334.4         | -1.5 | -0.9 | 96.3                     | 5                 | n/a                 | On-Demand                 |
| ZINC000360923420 | -56.8 ± 3.7                           | -7.6                                   | -7.9                                   | 0.53             | 346.4         | 3.7  | -5.7 | 59.8                     | 4                 | n/a                 | On-Demand                 |
| ZINC000225773639 | -56.8 ± 5.5                           | -7.3                                   | -7.4                                   | 0.54             | 392.5         | 3.6  | -5.8 | 67.4                     | 7                 | n/a                 | In-Stock                  |
| ZINC000343954913 | -56.7 ± 6.9                           | -7.4                                   | -7.4                                   | 0.53             | 336.4         | 3.3  | -4.4 | 32.8                     | 4                 | n/a                 | On-Demand                 |
| ZINC001227461380 | -56.6 ± 5.8                           | -8.3                                   | -8.4                                   | 0.54             | 344.3         | 1.9  | -2.1 | 116.5                    | 3                 | n/a                 | On-Demand                 |
| ZINC000177072716 | -56.3 ± 5.7                           | -7.9                                   | -7.4                                   | 0.54             | 366.5         | 3.4  | -5.2 | 70.0                     | 5                 | n/a                 | On-Demand                 |
| ZINC000125553818 | -56.1 ± 4.6                           | -7.1                                   | -7.6                                   | 0.54             | 337.4         | 4.2  | -5.1 | 64.0                     | 4                 | n/a                 | On-Demand                 |
| ZINC000763322433 | -56.0 ± 4.5                           | -7.6                                   | -7.3                                   | 0.54             | 340.5         | 4.6  | -5.2 | 70.7                     | 5                 | n/a                 | On-Demand                 |
| ZINC000916840567 | -56.0 ± 3.9                           | -7.2                                   | -7.7                                   | 0.58             | 349.5         | 3.3  | -4.4 | 35.6                     | 4                 | n/a                 | On-Demand                 |
| ZINC001220371832 | -55.9 ± 7.0                           | -7.4                                   | -7.9                                   | 0.46             | 352.4         | -2.7 | -1.2 | 139.5                    | 5                 | n/a                 | On-Demand                 |
| ZINC000006300080 | -55.4 ± 3.9                           | -7.0                                   | -7.9                                   | 0.47             | 411.3         | 2.9  | -4.9 | 74.6                     | 3                 | n/a                 | In-Stock                  |
| ZINC000349126162 | -55.2 ± 3.7                           | -7.1                                   | -7.7                                   | 0.49             | 338.3         | 2.9  | -4.9 | 72.2                     | 5                 | n/a                 | For-Sale                  |
| ZINC000815118295 | -55.1 ± 3.5                           | -7.6                                   | -7.2                                   | 0.45             | 318.8         | 2.9  | -4.0 | 61.8                     | 4                 | n/a                 | On-Demand                 |
| ZINC000577815676 | -54.8 ± 5.0                           | -7.5                                   | -7.3                                   | 0.53             | 304.3         | 2.4  | -3.4 | 81.4                     | 3                 | n/a                 | On-Demand                 |
| ZINC000816613055 | -54.5 ± 4.3                           | -7.8                                   | -7.3                                   | 0.53             | 289.7         | 2.9  | -3.8 | 58.6                     | 3                 | n/a                 | On-Demand                 |
| ZINC000437877883 | -54.4 ± 5.6                           | -7.4                                   | -7.4                                   | 0.46             | 346.4         | -0.5 | -2.2 | 122.6                    | 6                 | n/a                 | On-Demand                 |
| ZINC000436920544 | -54.4 ± 4.1                           | -7.6                                   | -7.5                                   | 0.54             | 312.3         | 2.5  | -4.7 | 80.2                     | 3                 | n/a                 | On-Demand                 |
| ZINC000684931125 | -54.3 ± 4.0                           | -7.1                                   | -7.5                                   | 0.56             | 291.4         | 2.2  | -4.9 | 48.1                     | 4                 | n/a                 | For-Sale                  |
| ZINC001229703580 | -54.2 ± 5.2                           | -8.1                                   | -8.7                                   | 0.55             | 354.3         | 1.2  | -3.1 | 113.3                    | 3                 | n/a                 | On-Demand                 |
| ZINC001560407559 | -54.2 ± 4.1                           | -8.0                                   | -8.8                                   | 0.56             | 304.3         | 1.5  | -2.0 | 127.5                    | 1                 | n/a                 | In-Stock                  |
| ZINC001229703504 | -54.0 ± 4.6                           | -8.3                                   | -8.9                                   | 0.55             | 366.3         | 1.6  | -3.8 | 113.3                    | 3                 | n/a                 | On-Demand                 |
| ZINC001573475559 | -54.0 ± 4.7                           | -7.6                                   | -7.6                                   | 0.51             | 385.4         | -1.3 | -1.3 | 132.9                    | 4                 | n/a                 | On-Demand                 |
| ZINC000000105082 | -53.3 ± 5.1                           | -8.3                                   | -8.5                                   | 0.55             | 304.3         | 1.7  | -2.1 | 127.5                    | 1                 | n/a                 | In-Stock                  |
| ZINC000479539365 | -53.2 ± 5.7                           | -7.8                                   | -7.2                                   | 0.55             | 309.4         | 3.4  | -4.9 | 44.4                     | 6                 | n/a                 | On-Demand                 |
| ZINC000624030914 | -52.8 ± 4.5                           | -7.3                                   | -8.3                                   | 0.46             | 365.4         | 0.1  | -3.7 | 121.1                    | 2                 | n/a                 | For-Sale                  |
| ZINC000336886040 | -52.7 ± 3.1                           | -7.1                                   | -7.4                                   | 0.56             | 299.8         | 3.4  | -3.4 | 50.1                     | 4                 | n/a                 | On-Demand                 |
| ZINC000502051659 | -52.6 ± 5.8                           | -7.1                                   | -7.7                                   | 0.49             | 354.4         | 4.1  | -5.4 | 59.1                     | 5                 | n/a                 | For-Sale                  |
| ZINC000596546841 | -52.4 ± 3.1                           | -7.4                                   | -7.6                                   | 0.53             | 327.7         | 2.5  | -5.9 | 87.6                     | 3                 | n/a                 | For-Sale                  |
| ZINC000016570894 | -52.4 ± 4.5                           | -7.4                                   | -8.0                                   | 0.53             | 472.9         | 3.0  | -5.4 | 73.0                     | 5                 | n/a                 | For-Sale                  |
| ZINC000003875620 | -52.4 ± 3.5                           | -8.2                                   | -8.6                                   | 0.67             | 316.3         | 0.0  | -2.1 | 116.5                    | 2                 | n/a                 | In-Stock                  |
| ZINC000614293727 | -52.0 ± 6.3                           | -7.6                                   | -7.3                                   | 0.56             | 280.3         | 3.7  | -4.7 | 73.1                     | 3                 | n/a                 | On-Demand                 |
| ZINC001168401640 | -51.6 ± 3.3                           | -7.5                                   | -7.4                                   | 0.53             | 340.3         | 2.1  | -3.0 | 58.6                     | 6                 | n/a                 | On-Demand                 |
| ZINC000059687825 | -51.4 ± 4.0                           | -7.0                                   | -7.7                                   | 0.59             | 362.4         | 0.1  | -3.3 | 77.5                     | 4                 | n/a                 | In-Stock                  |
| ZINC001610604328 | -51.2 ± 5.2                           | -7.6                                   | -7.5                                   | 0.55             | 312.4         | -2.0 | 0.0  | 77.4                     | 5                 | n/a                 | On-Demand                 |
| ZINC000290051168 | -51.0 ± 3.7                           | -7.7                                   | -7.7                                   | 0.54             | 279.3         | 3.7  | -5.0 | 38.3                     | 3                 | n/a                 | On-Demand                 |
| ZINC001045216116 | -50.9 ± 6.0                           | -7.7                                   | -7.5                                   | 0.53             | 348.4         | 0.2  | -2.7 | 81.6                     | 5                 | n/a                 | On-Demand                 |
| ZINC000224103212 | -50.8 ± 3.6                           | -7.2                                   | -7.5                                   | 0.52             | 475.6         | 3.5  | -5.0 | 65.9                     | 7                 | n/a                 | In-Stock                  |
| ZINC000779067247 | -50.8 ± 5.3                           | -7.4                                   | -7.2                                   | 0.52             | 298.3         | 2.8  | -3.2 | 58.3                     | 5                 | n/a                 | On-Demand                 |
| ZINC000065385626 | -50.7 ± 3.2                           | -7.4                                   | -7.3                                   | 0.6              | 310.3         | -1.3 | -1.0 | 85.4                     | 5                 | n/a                 | In-Stock                  |
| ZINC001450073782 | -50.6 ± 2.7                           | -7.2                                   | -7.6                                   | 0.46             | 296.3         | 1.1  | -3.8 | 126.7                    | 4                 | n/a                 | For-Sale                  |
| ZINC000065385629 | -50.6 ± 4.2                           | -7.2                                   | -7.4                                   | 0.6              | 310.3         | -1.3 | -1.0 | 85.4                     | 5                 | n/a                 | In-Stock                  |
| ZINC000833074436 | -50.5 ± 3.9                           | -7.4                                   | -7.5                                   | 0.57             | 271.3         | -0.8 | -0.3 | 93.0                     | 3                 | n/a                 | On-Demand                 |
| ZINC001219365937 | -50.3 ± 8.0                           | -7.5                                   | -8.1                                   | 0.45             | 338.4         | -2.7 | -1.1 | 139.5                    | 4                 | n/a                 | On-Demand                 |
| ZINC000154873179 | -50.2 ± 3.8                           | -7.6                                   | -7.8                                   | 0.46             | 351.4         | 0.3  | -3.1 | 127.8                    | 7                 | n/a                 | On-Demand                 |
| ZINC000035426457 | -50.1 ± 4.7                           | -7.3                                   | -7.3                                   | 0.57             | 271.3         | -0.8 | -0.4 | 93.0                     | 3                 | n/a                 | On-Demand                 |
| ZINC000117113459 | -50.0 ± 4.5                           | -7.5                                   | -7.3                                   | 0.54             | 328.4         | 3.9  | -5.9 | 71.5                     | 5                 | n/a                 | On-Demand                 |
| ZINC000940345878 | -49.7 ± 4.1                           | -8.1                                   | -7.7                                   | 0.47             | 345.4         | -2.0 | -2.0 | 119.7                    | 4                 | n/a                 | On-Demand                 |
| ZINC000940345761 | -49.6 ± 4.1                           | -7.8                                   | -7.4                                   | 0.45             | 331.4         | -2.1 | -2.4 | 119.7                    | 4                 | n/a                 | On-Demand                 |

|                  |             |      |      |      |       |      |      |       |   |     |           |
|------------------|-------------|------|------|------|-------|------|------|-------|---|-----|-----------|
| ZINC001324291630 | -49.5 ± 4.4 | -7.1 | -7.5 | 0.47 | 335.4 | -0.9 | -2.4 | 139.2 | 5 | n/a | On-Demand |
| ZINC000128113531 | -49.4 ± 4.9 | -7.4 | -7.5 | 0.54 | 331.4 | 2.9  | -4.4 | 45.2  | 3 | n/a | On-Demand |
| ZINC000667524349 | -49.3 ± 3.8 | -7.2 | -7.4 | 0.54 | 342.4 | -0.5 | -1.4 | 103.7 | 4 | n/a | On-Demand |
| ZINC000347640761 | -49.3 ± 3.4 | -7.3 | -7.5 | 0.53 | 295.3 | 2.4  | -3.5 | 72.0  | 3 | n/a | For-Sale  |
| ZINC001627243052 | -49.3 ± 3.9 | -7.2 | -7.7 | 0.54 | 349.4 | 2.9  | -4.7 | 65.4  | 4 | n/a | On-Demand |
| ZINC000437857922 | -47.8 ± 8.6 | -7.3 | -7.5 | 0.45 | 344.4 | 1.0  | -4.0 | 113.3 | 6 | n/a | On-Demand |
| ZINC001209530875 | -47.8 ± 5.2 | -7.3 | -7.3 | 0.48 | 351.4 | -1.9 | -1.1 | 130.6 | 8 | n/a | On-Demand |
| ZINC001009575024 | -47.8 ± 4.2 | -7.9 | -7.4 | 0.55 | 370.5 | 2.6  | -4.8 | 58.6  | 4 | n/a | On-Demand |
| ZINC001218424555 | -47.4 ± 4.3 | -8.1 | -8.4 | 0.54 | 370.4 | 1.3  | -2.5 | 116.5 | 4 | n/a | On-Demand |
| ZINC000068759657 | -47.3 ± 5.8 | -7.2 | -7.6 | 0.53 | 382.9 | 3.3  | -5.3 | 76.0  | 5 | n/a | On-Demand |
| ZINC000543440359 | -47.3 ± 3.1 | -7.0 | -7.5 | 0.54 | 334.8 | 4.1  | -5.8 | 59.1  | 3 | n/a | For-Sale  |
| ZINC000778587708 | -47.2 ± 5.6 | -7.6 | -7.4 | 0.59 | 323.4 | 2.1  | -4.0 | 75.4  | 5 | n/a | On-Demand |
| ZINC001170115101 | -46.9 ± 5.7 | -7.4 | -7.5 | 0.53 | 338.3 | -0.4 | -0.6 | 88.1  | 5 | n/a | On-Demand |
| ZINC000488902540 | -46.3 ± 5.0 | -7.4 | -7.8 | 0.52 | 301.3 | 3.1  | -5.4 | 74.9  | 3 | n/a | For-Sale  |
| ZINC000733546084 | -46.2 ± 4.5 | -7.4 | -8.1 | 0.47 | 375.4 | -0.1 | -2.7 | 131.4 | 6 | n/a | On-Demand |
| ZINC001189645413 | -45.8 ± 4.3 | -7.4 | -7.5 | 0.53 | 312.2 | 1.5  | -2.6 | 69.6  | 3 | n/a | On-Demand |
| ZINC000466425235 | -45.7 ± 4.5 | -7.7 | -7.6 | 0.57 | 338.3 | 3.2  | -5.0 | 32.3  | 5 | n/a | For-Sale  |
| ZINC001368308700 | -45.5 ± 3.7 | -7.4 | -7.5 | 0.52 | 334.4 | 0.8  | -1.1 | 96.2  | 5 | n/a | For-Sale  |
| ZINC000732955887 | -45.3 ± 5.1 | -7.9 | -7.6 | 0.54 | 349.3 | 0.9  | -4.9 | 100.4 | 5 | n/a | On-Demand |
| ZINC000732955886 | -45.3 ± 5.1 | -7.9 | -7.6 | 0.54 | 349.3 | 0.9  | -4.9 | 100.4 | 5 | n/a | On-Demand |
| ZINC000001689531 | -44.8 ± 4.4 | -8.2 | -8.5 | 0.55 | 304.3 | 1.0  | -2.1 | 127.5 | 1 | n/a | In-Stock  |
| ZINC000347488294 | -44.7 ± 2.4 | -7.3 | -7.5 | 0.53 | 294.3 | 3.2  | -4.8 | 59.1  | 3 | n/a | For-Sale  |
| ZINC000005733537 | -44.7 ± 4.6 | -7.8 | -7.5 | 0.53 | 314.3 | 0.6  | -3.1 | 85.2  | 3 | n/a | In-Stock  |
| ZINC001410147625 | -44.5 ± 3.2 | -7.4 | -7.3 | 0.47 | 325.3 | -0.4 | -2.2 | 133.1 | 7 | n/a | For-Sale  |
| ZINC001123890204 | -44.0 ± 6.2 | -7.9 | -7.7 | 0.48 | 356.4 | -1.9 | 0.0  | 91.3  | 6 | n/a | On-Demand |
| ZINC000553090364 | -43.9 ± 4.2 | -7.2 | -7.3 | 0.49 | 363.4 | 2.2  | -4.1 | 102.9 | 7 | n/a | On-Demand |
| ZINC001088166116 | -43.7 ± 8.1 | -7.3 | -7.9 | 0.47 | 354.5 | -1.2 | -0.3 | 66.3  | 6 | n/a | On-Demand |
| ZINC000003775158 | -43.6 ± 4.6 | -8.6 | -8.5 | 0.6  | 286.2 | 0.6  | -2.6 | 107.2 | 1 | n/a | In-Stock  |
| ZINC000512344696 | -43.5 ± 4.2 | -7.4 | -8.0 | 0.54 | 393.6 | 2.5  | -3.2 | 40.0  | 6 | n/a | On-Demand |
| ZINC000983531992 | -43.0 ± 2.8 | -7.5 | -7.6 | 0.46 | 345.4 | -1.7 | -1.7 | 128.5 | 5 | n/a | On-Demand |
| ZINC001225625327 | -42.5 ± 5.2 | -8.1 | -8.6 | 0.54 | 379.4 | 2.1  | -2.8 | 120.0 | 3 | n/a | On-Demand |
| ZINC001217945397 | -42.0 ± 4.8 | -8.2 | -8.2 | 0.53 | 400.4 | 1.4  | -3.5 | 81.6  | 4 | n/a | On-Demand |
| ZINC000524731490 | -41.8 ± 2.7 | -7.2 | -8.7 | 0.54 | 443.4 | -2.0 | -1.5 | 136.4 | 4 | n/a | In-Stock  |
| ZINC001262800712 | -41.6 ± 6.1 | -7.4 | -7.4 | 0.57 | 399.5 | 2.3  | -5.2 | 78.8  | 4 | n/a | On-Demand |
| ZINC001227462040 | -41.4 ± 4.6 | -8.2 | -8.5 | 0.56 | 394.4 | 2.5  | -3.3 | 116.5 | 4 | n/a | On-Demand |
| ZINC000348315879 | -41.2 ± 5.1 | -7.2 | -7.3 | 0.54 | 312.3 | 2.7  | -3.7 | 58.3  | 6 | n/a | On-Demand |
| ZINC001026583781 | -41.2 ± 8.0 | -7.7 | -7.9 | 0.46 | 356.4 | -0.8 | -3.2 | 119.9 | 4 | n/a | On-Demand |
| ZINC000407986242 | -41.1 ± 3.7 | -8.2 | -8.0 | 0.55 | 277.3 | 2.8  | -4.9 | 62.3  | 1 | n/a | In-Stock  |
| ZINC000095540481 | -41.0 ± 4.0 | -7.1 | -7.7 | 0.54 | 326.4 | 3.0  | -4.8 | 80.2  | 3 | n/a | On-Demand |
| ZINC000547274434 | -41.0 ± 4.6 | -7.2 | -7.4 | 0.55 | 411.3 | -0.4 | -2.1 | 74.1  | 4 | n/a | On-Demand |
| ZINC001227460663 | -40.8 ± 6.1 | -8.3 | -8.7 | 0.56 | 384.4 | 2.8  | -3.1 | 116.5 | 3 | n/a | On-Demand |
| ZINC000096114144 | -40.7 ± 3.8 | -7.4 | -8.5 | 0.53 | 420.4 | 2.6  | -3.8 | 126.4 | 2 | n/a | In-Stock  |
| ZINC000061624333 | -39.5 ± 5.0 | -7.4 | -7.8 | 0.53 | 399.5 | 3.8  | -5.6 | 75.4  | 6 | n/a | On-Demand |
| ZINC000614293483 | -39.4 ± 3.8 | -7.6 | -7.5 | 0.58 | 278.3 | 3.4  | -4.6 | 73.1  | 2 | n/a | On-Demand |
| ZINC000532472539 | -39.4 ± 4.4 | -7.1 | -7.6 | 0.48 | 358.5 | 2.3  | -4.8 | 75.1  | 6 | n/a | On-Demand |
| ZINC000152703551 | -38.7 ± 3.8 | -7.0 | -7.5 | 0.5  | 360.2 | 3.2  | -2.9 | 67.6  | 5 | n/a | For-Sale  |
| ZINC000095416842 | -38.1 ± 3.9 | -7.6 | -7.3 | 0.46 | 349.4 | 1.8  | -3.7 | 102.9 | 7 | n/a | For-Sale  |
| ZINC000014726551 | -37.6 ± 4.6 | -7.0 | -8.8 | 0.57 | 300.2 | 2.4  | -3.5 | 120.4 | 0 | n/a | In-Stock  |
| ZINC000079763441 | -37.3 ± 6.2 | -7.4 | -7.4 | 0.5  | 364.4 | 2.6  | -4.2 | 115.8 | 7 | n/a | On-Demand |
| ZINC001285432327 | -35.7 ± 6.1 | -7.8 | -7.3 | 0.53 | 348.3 | -2.1 | -1.2 | 138.2 | 8 | n/a | For-Sale  |
| ZINC001220589794 | -34.2 ± 6.1 | -7.1 | -7.4 | 0.47 | 370.4 | -1.0 | -2.0 | 136.6 | 5 | n/a | On-Demand |
| ZINC001324752707 | -32.9 ± 5.3 | -8.5 | -7.3 | 0.46 | 305.3 | -1.0 | -2.5 | 110.5 | 5 | n/a | On-Demand |
| ZINC001193635195 | -30.7 ± 5.5 | -7.3 | -7.2 | 0.58 | 255.2 | 0.1  | -0.8 | 106.2 | 2 | n/a | On-Demand |
| ZINC000646465837 | -29.4 ± 4.9 | -7.4 | -7.4 | 0.51 | 339.4 | 0.9  | -3.6 | 88.1  | 4 | n/a | On-Demand |
| ZINC001141388515 | -27.7 ± 5.6 | -7.5 | -7.2 | 0.56 | 329.7 | 0.8  | -4.2 | 90.5  | 3 | n/a | On-Demand |
| ZINC001013273066 | -26.5 ± 4.7 | -7.4 | -7.5 | 0.45 | 328.3 | -0.8 | -2.7 | 131.2 | 3 | n/a | On-Demand |
| ZINC001175098626 | -16.0 ± 4.3 | -7.5 | -7.4 | 0.54 | 386.5 | 2.7  | -4.7 | 95.8  | 5 | n/a | For-Sale  |

Compounds in italics are hits reported in the main text. For some compounds no toxicity assessment was performed (n/a).

<sup>a</sup>Ligand free binding energy predicted by MM/GBSA approach (excluding entropic contributions) with standard deviation;

<sup>b</sup>Lowest docking score from docking against ensemble of five structures;

<sup>c</sup>Number of rotatable bonds;

<sup>d</sup>Toxic potential determined in the VirtualToxLab;

<sup>e</sup>Availability of the compounds according to the ZINC database.<sup>4</sup>

**Table S3.** All hits for which MD simulations were conducted for the compounds with MW above 500 g/mol.

| ZINC ID                 | $\Delta G$<br>(kcal/mol) <sup>a</sup> | Glide score<br>(kcal/mol) <sup>b</sup> | Smina Score<br>(kcal/mol) <sup>b</sup> | Shape<br>overlap | MW<br>(g/mol) | logD | logS  | PSA<br>(Å <sup>2</sup> ) | #rot <sup>c</sup> | ToxPot <sup>d</sup> | Availability <sup>e</sup> |
|-------------------------|---------------------------------------|----------------------------------------|----------------------------------------|------------------|---------------|------|-------|--------------------------|-------------------|---------------------|---------------------------|
| ZINC000072130459        | -95.2 ± 4.1                           | -7.0                                   | -9.0                                   | 0.65             | 556.6         | 7.4  | -8.8  | 74.2                     | 10                | 0.685               | In-Stock                  |
| ZINC000020731346        | -93.6 ± 4.7                           | -7.6                                   | -7.9                                   | 0.46             | 508.4         | 4.8  | -8.0  | 53.1                     | 4                 | 0.553               | For-Sale                  |
| <i>ZINC000098047142</i> | -91.8 ± 4.1                           | -8.2                                   | -9.1                                   | 0.47             | 747.3         | 11.7 | -12.6 | 54.0                     | 10                | 0.439               | In-Stock                  |
| <i>ZINC000225252997</i> | -91.4 ± 5.1                           | -7.7                                   | -7.7                                   | 0.46             | 500.6         | 5.9  | -8.0  | 67.4                     | 9                 | 0.454               | In-Stock                  |
| ZINC000103644480        | -88.3 ± 4.0                           | -7.4                                   | -8.6                                   | 0.46             | 550.6         | 8.5  | -10.1 | 65.3                     | 5                 | 0.536               | For-Sale                  |
| <i>ZINC000409081785</i> | -84.8 ± 5.1                           | -8.6                                   | -8.5                                   | 0.52             | 672.8         | 8.4  | -9.4  | 76.0                     | 6                 | 0.331               | In-Stock                  |
| ZINC000097944956        | -84.5 ± 5.0                           | -7.4                                   | -8.6                                   | 0.46             | 550.6         | 8.5  | -10.1 | 65.3                     | 5                 | 0.536               | In-Stock                  |
| ZINC000002357423        | -83.6 ± 5.2                           | -7.2                                   | -8.8                                   | 0.46             | 513.9         | 6.6  | -9.0  | 63.2                     | 5                 | 0.623               | In-Stock                  |
| <i>ZINC000409079528</i> | -82.7 ± 4.6                           | -8.5                                   | -8.1                                   | 0.50             | 652.4         | 8.3  | -9.3  | 76.0                     | 6                 | 0.291               | In-Stock                  |
| ZINC000036158243        | -82.5 ± 5.9                           | -7.4                                   | -7.9                                   | 0.49             | 520.4         | 2.6  | -5.8  | 87.7                     | 8                 | 0.477               | For-Sale                  |
| <i>ZINC000100708038</i> | -81.7 ± 4.8                           | -8.2                                   | -8.8                                   | 0.48             | 553.6         | 5.5  | -7.7  | 106.5                    | 7                 | 0.304               | In-Stock                  |
| ZINC000034736583        | -79.6 ± 3.8                           | -7.7                                   | -8.1                                   | 0.45             | 502.8         | 6.2  | -8.5  | 52.7                     | 5                 | 0.525               | For-Sale                  |
| ZINC000004195875        | -78.3 ± 4.9                           | -7.5                                   | -8.5                                   | 0.46             | 516.4         | 7.0  | -8.2  | 54.8                     | 5                 | 0.507               | In-Stock                  |
| <i>ZINC000035689851</i> | -74.5 ± 4.7                           | -7.2                                   | -7.5                                   | 0.46             | 508.4         | 6.0  | -7.4  | 70.1                     | 8                 | 0.387               | For-Sale                  |
| ZINC000013575045        | -73.0 ± 4.2                           | -7.8                                   | -7.7                                   | 0.49             | 513.7         | 3.7  | -8.0  | 83.8                     | 8                 | 0.367               | In-Stock                  |
| ZINC000102922714        | -72.6 ± 7.3                           | -7.6                                   | -8.4                                   | 0.47             | 618.5         | 6.6  | -9.2  | 83.1                     | 9                 | 0.414               | In-Stock                  |
| ZINC000011757999        | -72.3 ± 5.7                           | -8.2                                   | -8.1                                   | 0.45             | 539.6         | 6.0  | -7.3  | 97.3                     | 9                 | 0.204               | In-Stock                  |
| ZINC000098021319        | -72.0 ± 4.9                           | -7.5                                   | -7.2                                   | 0.46             | 552.9         | 6.2  | -7.6  | 70.1                     | 8                 | 0.374               | For-Sale                  |
| ZINC000097946172        | -70.0 ± 7.4                           | -7.5                                   | -8.9                                   | 0.48             | 572.7         | 8.7  | -9.2  | 59.7                     | 8                 | 0.378               | In-Stock                  |
| ZINC000100415333        | -69.6 ± 4.5                           | -7.0                                   | -8.9                                   | 0.45             | 570.3         | 5.1  | -7.8  | 80.8                     | 3                 | n/a                 | In-Stock                  |
| ZINC000000788070        | -68.2 ± 6.0                           | -7.1                                   | -8.2                                   | 0.45             | 500.3         | 5.6  | -6.2  | 67.4                     | 8                 | n/a                 | In-Stock                  |
| ZINC000102973979        | -67.3 ± 5.1                           | -7.4                                   | -8.6                                   | 0.56             | 584.3         | 6.9  | -9.1  | 63.0                     | 4                 | n/a                 | In-Stock                  |

|                  |             |      |      |      |       |      |      |       |    |     |           |
|------------------|-------------|------|------|------|-------|------|------|-------|----|-----|-----------|
| ZINC000097971922 | -66.7 ± 6.5 | -8.2 | -7.9 | 0.48 | 584.6 | 3.0  | -4.1 | 163.0 | 10 | n/a | In-Stock  |
| ZINC000150383182 | -64.7 ± 5.7 | -7.1 | -8.4 | 0.46 | 667.8 | 2.9  | -4.5 | 133.8 | 16 | n/a | In-Stock  |
| ZINC000223764140 | -64.7 ± 6.2 | -7.5 | -7.9 | 0.47 | 519.1 | 7.4  | -9.3 | 58.2  | 8  | n/a | In-Stock  |
| ZINC000036158329 | -64.0 ± 6.1 | -7.5 | -8.3 | 0.50 | 504.4 | 3.4  | -6.5 | 78.5  | 6  | n/a | For-Sale  |
| ZINC000103418421 | -60.4 ± 5.1 | -8.3 | -9.1 | 0.46 | 550.6 | 6.1  | -7.4 | 55.8  | 5  | n/a | For-Sale  |
| ZINC000012412803 | -60.0 ± 5.5 | -7.3 | -8.1 | 0.47 | 504.4 | 3.0  | -2.2 | 74.9  | 5  | n/a | In-Stock  |
| ZINC000003408051 | -58.2 ± 4.6 | -7.4 | -7.2 | 0.47 | 533.2 | 5.5  | -7.8 | 104.0 | 6  | n/a | In-Stock  |
| ZINC000103120251 | -58.1 ± 5.6 | -7.8 | -8.1 | 0.48 | 534.4 | 5.3  | -7.0 | 75.5  | 6  | n/a | For-Sale  |
| ZINC000100004777 | -57.4 ± 4.6 | -7.7 | -8.5 | 0.49 | 525.4 | 7.3  | -9.0 | 61.4  | 4  | n/a | In-Stock  |
| ZINC000102757914 | -55.7 ± 4.6 | -7.8 | -8.3 | 0.50 | 539.8 | 6.7  | -9.0 | 63.0  | 4  | n/a | In-Stock  |
| ZINC000103140857 | -55.7 ± 5.3 | -7.8 | -7.9 | 0.48 | 538.4 | 5.2  | -7.3 | 75.5  | 6  | n/a | For-Sale  |
| ZINC000408583162 | -53.2 ± 6.1 | -7.3 | -7.8 | 0.45 | 532.2 | 7.1  | -9.0 | 42.9  | 6  | n/a | In-Stock  |
| ZINC000100408112 | -51.0 ± 7.0 | -7.1 | -8.5 | 0.48 | 569.4 | 8.6  | -9.5 | 72.5  | 6  | n/a | In-Stock  |
| ZINC000034735622 | -47.5 ± 3.1 | -7.5 | -7.7 | 0.45 | 501.9 | 5.9  | -8.1 | 52.7  | 6  | n/a | For-Sale  |
| ZINC000101601966 | -44.0 ± 3.6 | -9.2 | -9.3 | 0.45 | 569.6 | -1.0 | -0.6 | 142.2 | 7  | n/a | In-Stock  |
| ZINC000514383436 | -42.6 ± 3.9 | -7.5 | -8.0 | 0.46 | 572.6 | 4.5  | -7.1 | 110.5 | 10 | n/a | On-Demand |

Compounds in italics are hits reported in the main text. For some compounds no toxicity assessment was performed (n/a).

<sup>a</sup>Ligand free binding energy predicted by MM/GBSA approach (excluding entropic contributions) with standard deviation;

<sup>b</sup>Lowest docking score from docking against ensemble of five structures;

<sup>c</sup>Number of rotatable bonds;

<sup>d</sup>Toxic potential determined in the VirtualToxLab;

<sup>e</sup>Availability of the compounds according to the ZINC database.<sup>4</sup>

## Final Selection of Compounds

**Figure S6.** Binding modes of the reported compounds.

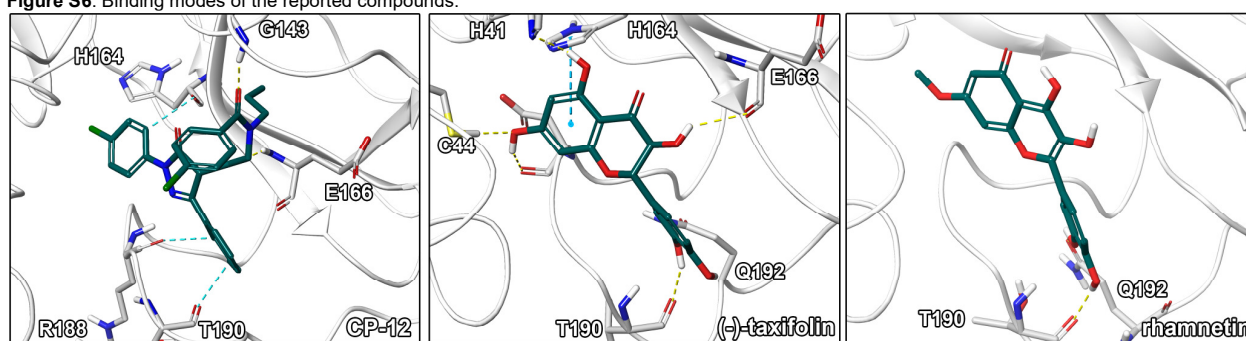

The binding modes were assessed for the MD frame with lowest binding free energy according to MM/GBSA post-processing.

**Table S4.** Number of hydrogen bonds of the proposed compounds.

| Compound             | Hydrogen bonds |
|----------------------|----------------|
| Apixaban             | 3              |
| Nelfinavir           | 7              |
| Glecaprevir          | 4              |
| Lorecivivint         | 5              |
| Rivaroxaban          | 5              |
| Betrixaban           | 1              |
| Saquinavir           | 4              |
| Voxilaprevir         | 3              |
| Amprnavir            | 4              |
| Average repurposing  | 4.0            |
| CP-1                 | 5              |
| CP-2                 | 5              |
| CP-3                 | 3              |
| CP-4                 | 1              |
| CP-5                 | 3              |
| CP-6                 | 5              |
| CP-7                 | 2              |
| CP-8                 | 4              |
| CP-9                 | 3              |
| CP-10                | 3              |
| CP-11                | 2              |
| CP-12                | 2              |
| (-)-taxifolin        | 6              |
| Average shape screen | 3.4            |

The number of hydrogen bonds was determined for the MD frame with lowest binding free energy.

**Table S5.** Natural compounds determined in main screening.

| ZINC ID           | Trivial name  | $\Delta G$<br>(kcal/mol) <sup>a</sup> |
|-------------------|---------------|---------------------------------------|
| ZINC000000105082  | (-)-taxifolin | -53.3 ± 5.1                           |
| ZINC0000003875620 | Rhamnetin     | -52.4 ± 3.5                           |
| n/a               | (+)-taxifolin | -39.5 ± 5.7                           |

<sup>a</sup>Ligand free binding energy predicted by MM/GBSA approach (excluding entropic contributions) with standard deviation.

**Figure S7.** Off-target binding profile of the reported compounds.

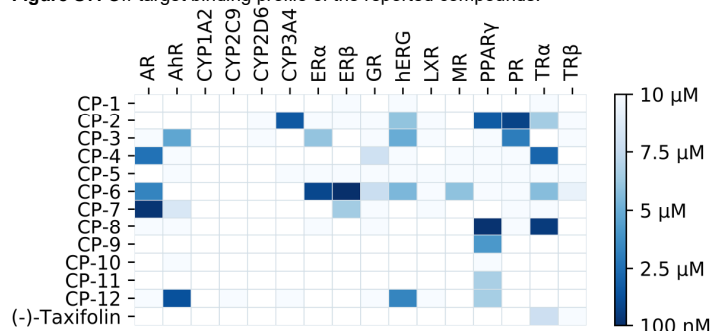

The off-target binding profile was obtained from the VirtualToxLab.<sup>5,6</sup>

**Figure S8.** Schematic depiction of the screening for drug repurposing.

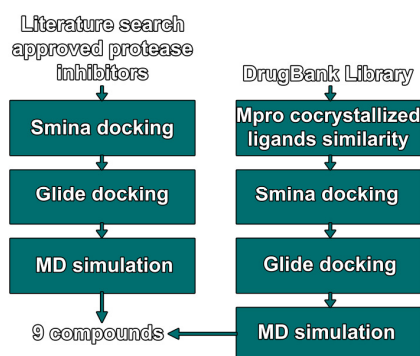

**Table S6.** Results from the screen for drug repurposing.

| Trivial Name         | DrugBank ID | Indication <sup>a</sup> | $\Delta G$ (kcal/mol) <sup>b</sup> | Glide score (kcal/mol) <sup>c</sup> | Smina Score (kcal/mol) <sup>c</sup> | Origin <sup>d</sup> | Approval status <sup>e</sup> |
|----------------------|-------------|-------------------------|------------------------------------|-------------------------------------|-------------------------------------|---------------------|------------------------------|
| Apixaban             | DB06605     | Anticoagulant           | -84.0 ± 5.5                        | -7.7                                | -8.7                                | Literature          | yes                          |
| Nelfinavir           | DB00220     | Antiviral               | -80.6 ± 8.2                        | -8.4                                | -9.2                                | Literature          | yes                          |
| Glecaprevir          | DB13879     | Antiviral               | -80.3 ± 5.2                        | -5.9                                | -9.1                                | Literature          | yes                          |
| Lorecivivint         | DB14883     | Inflammation            | -79.7 ± 5.0                        | -7.0                                | -9.2                                | Similarity search   | no                           |
| Rivaroxaban          | DB06228     | Anticoagulant           | -77.2 ± 4.1                        | -6.8                                | -7.9                                | Literature          | yes                          |
| Betrixaban           | DB12364     | Anticoagulant           | -73.3 ± 3.8                        | -7.0                                | -8.1                                | Literature          | yes                          |
| Saquinavir           | DB01232     | Antiviral               | -71.5 ± 8.8                        | -8.2                                | -8.7                                | Literature          | yes                          |
| Voxilaprevir         | DB12026     | Antiviral               | -66.5 ± 4.6                        | -7.2                                | -8.3                                | Literature          | yes                          |
| Amprenavir           | DB00701     | Antiviral               | -66.5 ± 6.8                        | -6.7                                | -7.4                                | Literature          | yes                          |
| Telaprevir           | DB05521     | Antiviral               | -63.3 ± 7.7                        | -7.6                                | -7.5                                | Literature          | yes                          |
| Simeprevir           | DB06290     | Antiviral               | -62.4 ± 3.7                        | -8.1                                | -9.0                                | Literature          | yes                          |
| Darunavir            | DB01264     | Antiviral               | -61.4 ± 6.9                        | -7.5                                | -8.2                                | Similarity search   | yes                          |
| n/a                  | DB07991     | Antiestrogen            | -61.4 ± 5.1                        | -7.5                                | -7.8                                | Similarity search   | no                           |
| (R)-boceprevir       | DB08873     | Antiviral               | -60.7 ± 5.8                        | -7.2                                | -7.6                                | Literature          | yes                          |
| N3                   | n/a         | Antiviral               | -59.3 ± 7.6                        | -9.9                                | -7.7                                | Protein Data Bank   | no                           |
| n/a                  | DB01810     | Cancer                  | -58.8 ± 4.4                        | -8.6                                | -7.3                                | Similarity search   | no                           |
| n/a                  | DB06890     | Antifungal              | -55.7 ± 3.2                        | -6.2                                | -5.9                                | Similarity search   | no                           |
| Asunaprevir          | DB11586     | Antiviral               | -55.1 ± 5.8                        | -6.3                                | -8.0                                | Literature          | yes                          |
| n/a                  | DB07222     | Unknown                 | -53.6 ± 4.0                        | -6.6                                | -6.8                                | Similarity search   | no                           |
| Tipranavir           | DB00932     | Antiviral               | -52.8 ± 4.4                        | -6.0                                | -8.3                                | Literature          | yes                          |
| Indinavir            | DB00224     | Antiviral               | -52.4 ± 6.0                        | -6.5                                | -8.5                                | Literature          | yes                          |
| Difenpiramide        | DB13371     | Unknown                 | -52.0 ± 4.5                        | -6.2                                | -7.1                                | Similarity search   | no                           |
| Grazoprevir          | DB11575     | Antiviral               | -51.1 ± 7.1                        | -6.1                                | -8.9                                | Literature          | yes                          |
| Topiroxostat         | DB01685     | Unknown                 | -50.5 ± 3.6                        | -6.4                                | -7.1                                | Similarity search   | no                           |
| (S)-boceprevir       | DB08873     | Antiviral               | -49.7 ± 3.9                        | -7.4                                | -7.8                                | Literature          | yes                          |
| n/a                  | DB07781     | Unknown                 | -48.0 ± 3.6                        | -5.4                                | -6.4                                | Similarity search   | no                           |
| Atazanavir           | DB01072     | Antiviral               | -47.8 ± 9.2                        | -6.4                                | -7.3                                | Literature          | yes                          |
| Pyroxamide           | DB12847     | Unknown                 | -47.3 ± 3.9                        | -3.0                                | -6.3                                | Similarity search   | no                           |
| MSX-122              | DB12715     | Unknown                 | -46.7 ± 4.4                        | -4.8                                | -6.5                                | Similarity search   | no                           |
| Paritaprevir         | DB09297     | Antiviral               | -46.4 ± 6.0                        | -8.1                                | -9.5                                | Literature          | yes                          |
| Lopinavir            | DB01601     | Antiviral               | -46.1 ± 8.3                        | -8.9                                | -7.8                                | Literature          | yes                          |
| Ritonavir            | DB00503     | Antiviral               | -45.8 ± 7.5                        | -7.5                                | -8.0                                | Literature          | yes                          |
| n/a                  | DB07152     | Unknown                 | -44.4 ± 4.1                        | -6.4                                | -8.8                                | Similarity search   | no                           |
| N-acetylserotonin    | DB04275     | Unknown                 | -41.3 ± 5.2                        | -6.6                                | -6.3                                | Similarity search   | no                           |
| n/a                  | DB04601     | Unknown                 | -38.2 ± 4.1                        | -6.8                                | -7.4                                | Similarity search   | no                           |
| Dapivirine           | DB08639     | Antiviral               | -36.6 ± 3.0                        | -6.5                                | -7.4                                | Similarity search   | no                           |
| Dansylamide          | DB02866     | Unknown                 | -35.5 ± 4.1                        | -5.5                                | -5.9                                | Similarity search   | no                           |
| Melatonin            | DB01065     | Insomnia                | -33.7 ± 3.3                        | -5.9                                | -5.9                                | Similarity search   | yes                          |
| Indane-5-sulfonamide | DB08165     | Unknown                 | -28.2 ± 2.8                        | -6.3                                | -5.7                                | Similarity search   | no                           |
| Fosamprenavir        | DB01319     | Antiviral               | -25.3 ± 4.3                        | -6.9                                | -7.6                                | Literature          | yes                          |
| n/a                  | DB03468     | Unknown                 | -21.9 ± 3.5                        | -6.2                                | -5.9                                | Similarity search   | no                           |
| n/a                  | DB07114     | Unknown                 | -14.6 ± 4.8                        | -5.8                                | -5.6                                | Similarity search   | no                           |

<sup>a</sup>Indication retrieved from the DrugBank database;<sup>7</sup>

<sup>b</sup>Ligand free binding energy predicted by MM/GBSA approach (excluding entropic contributions) with standard deviation;

<sup>c</sup>Lowest docking score from docking against ensemble of five structures;

<sup>d</sup>Workflow from which the compound was selected for MD;

<sup>e</sup>Approval status of the compound according to the DrugBank database.<sup>7</sup>

## Supporting Materials and Methods

### Docking and shape screening

**Table S7.** SARS-CoV-1 inhibitors derived from the PubChem database for template selection in shape screening.

| PubChem<br>Compound ID | Activity<br>type | Activity ( $\mu\text{M}$ ) | Method             | PubChem<br>bioassay ID | Selection <sup>a</sup> |
|------------------------|------------------|----------------------------|--------------------|------------------------|------------------------|
| 127045229              | IC <sub>50</sub> | 6.7                        | Fluorimetric assay | 1304461                | no                     |
| 127045221              | IC <sub>50</sub> | 8.6                        | Fluorimetric assay | 1304461                | no                     |
| 127043644              | IC <sub>50</sub> | 6.4                        | Fluorimetric assay | 1304461                | no                     |
| 127043642              | IC <sub>50</sub> | 5.8                        | Fluorimetric assay | 1304461                | yes                    |
| 127043641              | IC <sub>50</sub> | 6.0                        | Fluorimetric assay | 1304461                | no                     |
| 25256829               | IC <sub>50</sub> | 5.4                        | FRET               | 417985                 | yes                    |
| 45271832               | IC <sub>50</sub> | 8.1                        | FRET               | 430140                 | no                     |
| 45271831               | IC <sub>50</sub> | 9.3                        | FRET               | 430140                 | no                     |
| 45271826               | IC <sub>50</sub> | 5.2                        | FRET               | 430140                 | no                     |
| 45270979               | IC <sub>50</sub> | 4.1                        | FRET               | 430140                 | yes                    |
| 44517748               | IC <sub>50</sub> | 2.7                        | FRET               | 430140                 | no                     |
| 5280343                | IC <sub>50</sub> | 8.1                        | FRET               | 430140                 | no                     |
| 2131982                | K <sub>i</sub>   | 9.9                        | FRET               | 596993                 | no                     |
| 2131972                | K <sub>i</sub>   | 9.1                        | FRET               | 596993                 | yes                    |

<sup>a</sup>Depiction if compound was used in shape screening.

### Supporting References

- (1) Pillaiyar, T.; Manickam, M.; Namasivayam, V.; Hayashi, Y.; Jung, S. H. An Overview of Severe Acute Respiratory Syndrome-Coronavirus (SARS-CoV) 3CL Protease Inhibitors: Peptidomimetics and Small Molecule Chemotherapy. *J. Med. Chem.* **2016**, *59*, 6595–6628.
- (2) Recio, C.; Maione, F.; Iqbal, A. J.; Mascolo, N.; De Feo, V. The Potential Therapeutic Application of Peptides and Peptidomimetics in Cardiovascular Disease. *Front. Pharmacol.* **2017**, *7*, 1–11.
- (3) Diamond. Main protease structure and XChem fragment screen <https://www.diamond.ac.uk/covid-19/for-scientists/Main-protease-structure-and-XChem/Downloads.html> (accessed Mar 20, 2020).
- (4) Sterling, T.; Irwin, J. J. ZINC 15 - Ligand Discovery for Everyone. *J. Chem. Inf. Model.* **2015**, *55*, 2324–2337.
- (5) Vedani, A.; Dobler, M.; Smieško, M. VirtualToxLab - A Platform for Estimating the Toxic Potential of Drugs, Chemicals and Natural Products. *Toxicol. Appl. Pharmacol.* **2012**, *261*, 142–153.
- (6) Vedani, A.; Dobler, M.; Hu, Z.; Smieško, M. OpenVirtualToxLab-A Platform for Generating and Exchanging in Silico Toxicity Data. *Toxicol. Lett.* **2015**, *232*, 519–532.
- (7) Wishart, D. S.; Feunang, Y. D.; Guo, A. C.; Lo, E. J.; Marcu, A.; Grant, J. R.; Sajed, T.; Johnson, D.; Li, C.; Sayeeda, Z.; et al. DrugBank 5.0: A Major Update to the DrugBank Database for 2018. *Nucleic Acids Res.* **2018**, *46*, D1074–D1082.
